# Supplementary material for: Exploring the impact of tertiary lymphoid structures maturity in NSCLC: insights from TLS scoring
Source: PubMed Central journal article supplement (PMC11457083; doi:10.3389/fimmu.2024.1422206), 2024-09-20
Supplement: DataSheet1.pdf [file DataSheet1.pdf]

## SUPPLEMENTAL FIGURE 1

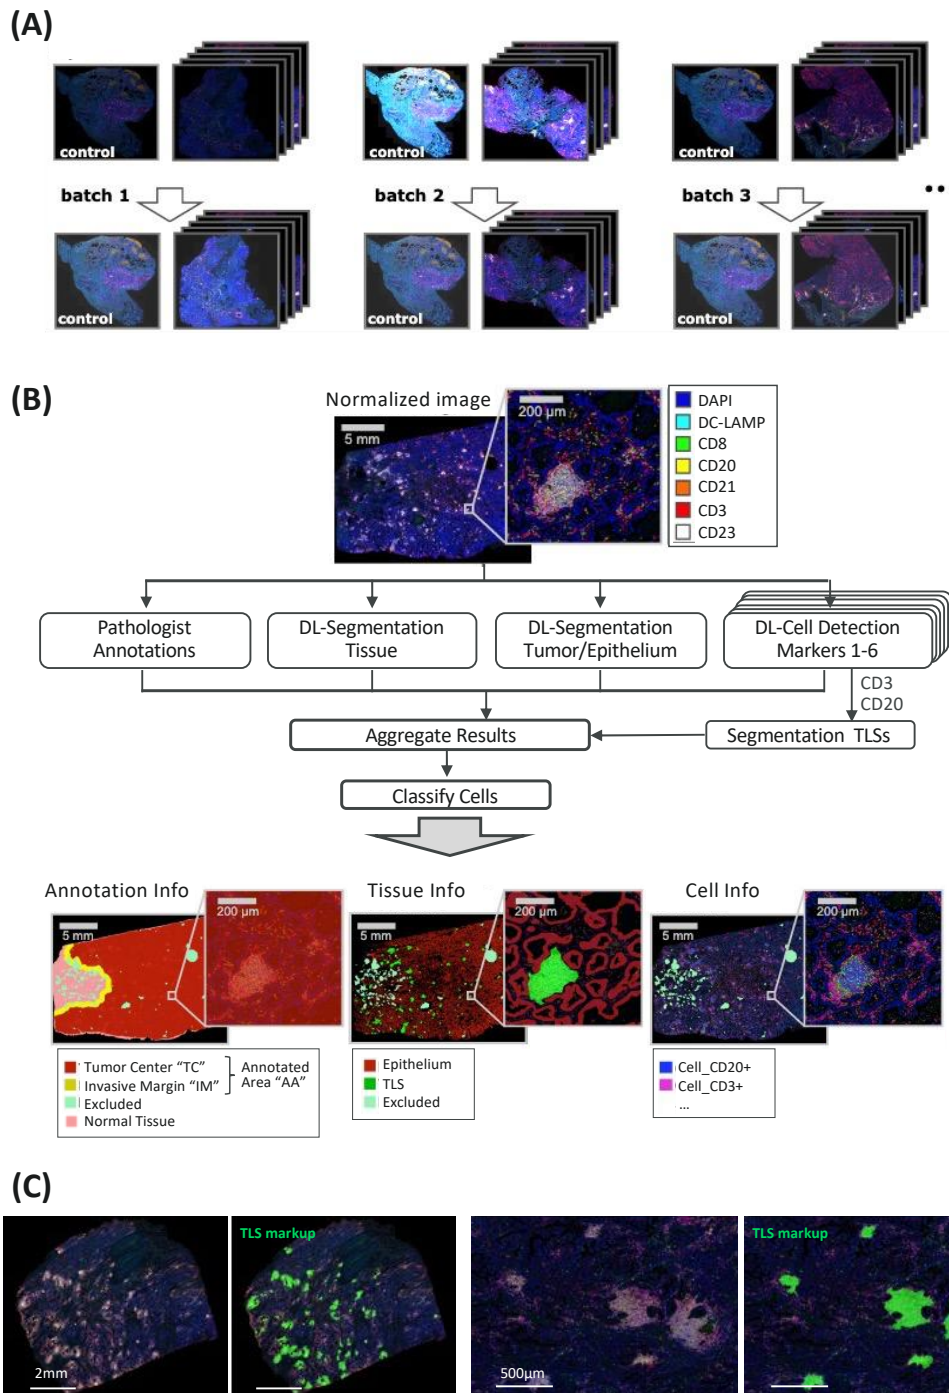

**Supplementary Figure 1: Image analysis workflow to specifically detect TLS structures and evaluate their cellular composition. (A)** Normalization of the staining intensities using the batch controls images corresponding to serial sections of Tonsil and NSCLC control tissues stained at each experimental run. Slides were imaged using the Phenolmager HT automated imaging system. **(B)** Annotation of the normalized images by pathologists, and development of Deep Learning algorithms to segment the tumor tissues into different tissue areas and detect cell positivity for each marker (CD3, CD8, CD20, CD21, CD23 and DC-LAMP). **(C)** Representative images of TLS / B-cell clusters detection using our image analysis solution. Scale bars are indicated.

**SUPPLEMENTAL FIGURE 2**

**(A)**

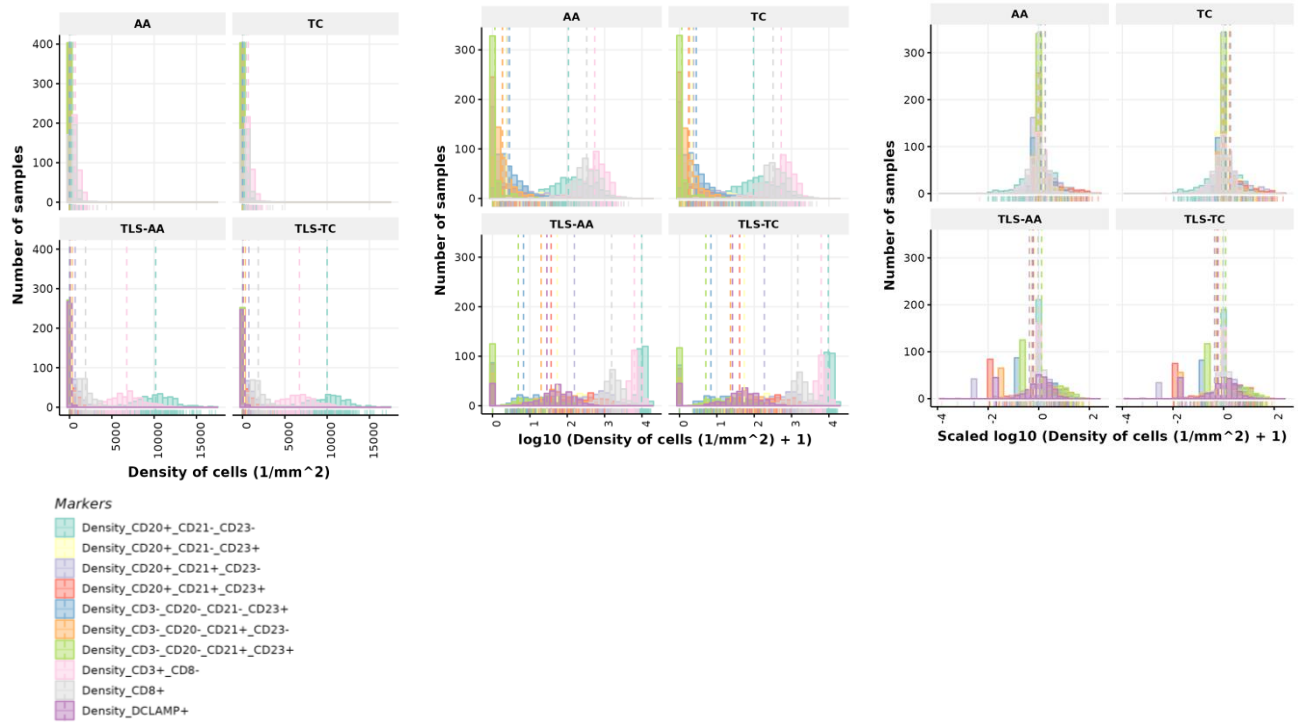

**(B)**

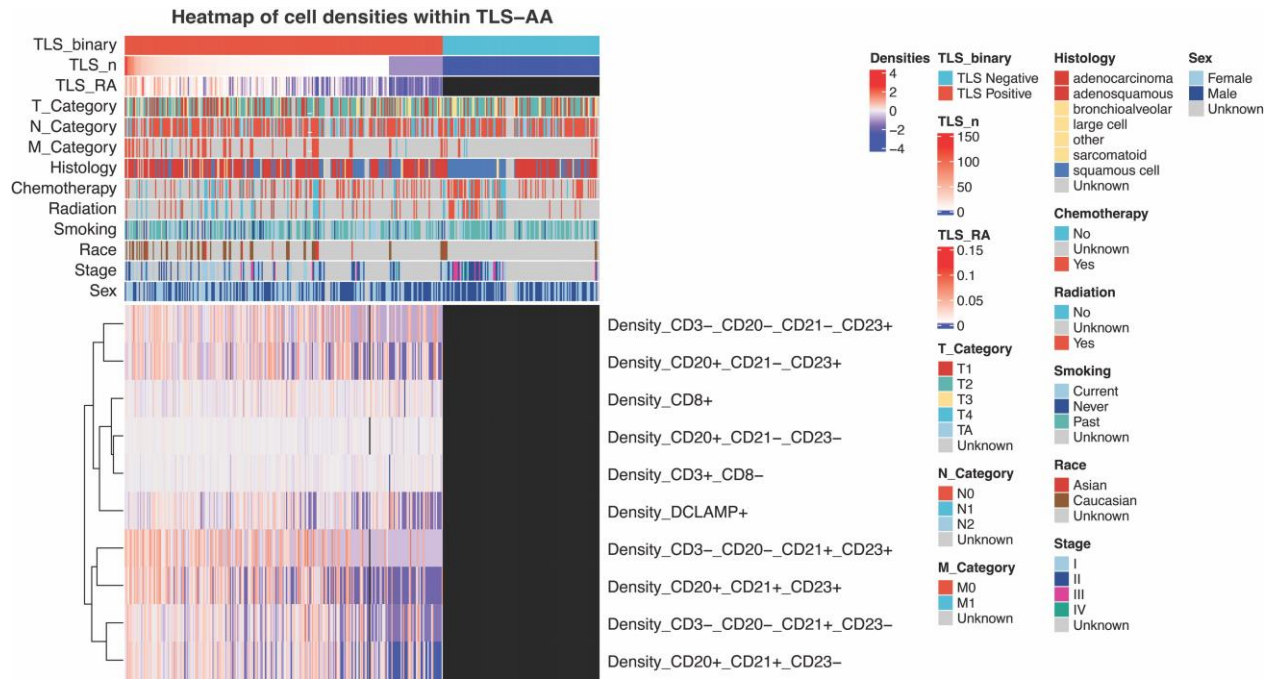

**Supplementary figure 2: Cell densities within the different tumor tissue areas and heatmap visualisation using the cell phenotypes densities within TLS structures.**

**(A)** Histograms showing the cell densities in NSCLC samples. The x-axis represents the raw densities (left panel), the densities after logarithmic transformation (base 10) (middle panel) and the scaled densities following the  $\log_{10}$  transformation (right panel). The y-axis represents the number of samples. The dotted lines represent the median cell density values of the cell phenotypes. **(B)** Heatmap showing the scaled density (following the  $\log_{10}$  transformation) of ten cell phenotypes in the TLS-specific 'TLS-AA' region and their association with sex, stage, race, smoking status, therapy (radiation and chemotherapy), histology and other covariates. Individual patients are represented in each column. Each row represents the cell density of a specific cell phenotype located within the TLS-AA region.

**SUPPLEMENTAL TABLE 1**

**C-index, Hazard ratio, 95% CI and p-values of divers TLS features and cell densities (in log<sub>10</sub> scaled) within different tissue areas.**

| <b>Variables</b>            | <b>Region</b> | <b>cindex</b> | <b>HR</b> | <b>HR95lo</b> | <b>HR95hi</b> | <b>pval</b> |
|-----------------------------|---------------|---------------|-----------|---------------|---------------|-------------|
| TLS Relative area           | N/A           | 0.539         | 0.000     | 0.000         | 0.469         | 0.041       |
| TLS number                  | N/A           | 0.559         | 0.982     | 0.964         | 1.001         | 0.070       |
| TLS Relative area scaled    | N/A           | 0.539         | 0.766     | 0.594         | 0.989         | 0.041       |
| TLS number scaled           | N/A           | 0.559         | 0.757     | 0.561         | 1.023         | 0.070       |
| TLS binary TLS Positive     | N/A           | 0.548         | 0.757     | 0.565         | 1.015         | 0.063       |
| Age                         | N/A           | 0.597         | 1.038     | 1.021         | 1.057         | 0.000       |
| AA (Total annotated area)   | N/A           | 0.525         | 1.001     | 0.997         | 1.005         | 0.722       |
| Density CD20+CD21-CD23-     | AA            | 0.574         | 0.691     | 0.554         | 0.863         | 0.001       |
| Density CD20+CD21-CD23-     | TC            | 0.575         | 0.685     | 0.551         | 0.853         | 0.001       |
| Density CD20+CD21-CD23-     | TLS-AA        | 0.487         | 0.750     | 0.160         | 3.517         | 0.715       |
| Density CD20+CD21-CD23-     | TLS-TC        | 0.540         | 1.576     | 0.358         | 6.941         | 0.547       |
| Density CD20+CD21-CD23+     | AA            | 0.567         | 0.640     | 0.450         | 0.911         | 0.013       |
| Density CD20+CD21-CD23+     | TC            | 0.564         | 0.629     | 0.434         | 0.911         | 0.014       |
| Density CD20+CD21-CD23+     | TLS-AA        | 0.528         | 0.958     | 0.788         | 1.164         | 0.663       |
| Density CD20+CD21-CD23+     | TLS-TC        | 0.523         | 0.959     | 0.781         | 1.178         | 0.690       |
| Density CD20+CD21+CD23-     | AA            | 0.578         | 0.576     | 0.404         | 0.823         | 0.002       |
| Density CD20+CD21+CD23-     | TC            | 0.570         | 0.601     | 0.421         | 0.859         | 0.005       |
| Density CD20+CD21+CD23-     | TLS-AA        | 0.573         | 0.851     | 0.729         | 0.992         | 0.039       |
| Density CD20+CD21+CD23-     | TLS-TC        | 0.569         | 0.842     | 0.716         | 0.990         | 0.037       |
| Density CD20+CD21+CD23+     | AA            | 0.557         | 0.717     | 0.491         | 1.047         | 0.085       |
| Density CD20+CD21+CD23+     | TC            | 0.556         | 0.721     | 0.483         | 1.077         | 0.110       |
| Density CD20+CD21+CD23+     | TLS-AA        | 0.553         | 0.873     | 0.745         | 1.023         | 0.092       |
| Density CD20+CD21+CD23+     | TLS-TC        | 0.551         | 0.870     | 0.739         | 1.025         | 0.097       |
| Density CD3-CD20-CD21-CD23+ | AA            | 0.538         | 0.773     | 0.494         | 1.210         | 0.260       |
| Density CD3-CD20-CD21-CD23+ | TC            | 0.537         | 0.773     | 0.493         | 1.212         | 0.262       |
| Density CD3-CD20-CD21-CD23+ | TLS-AA        | 0.490         | 1.037     | 0.795         | 1.352         | 0.789       |
| Density CD3-CD20-CD21-CD23+ | TLS-TC        | 0.507         | 1.133     | 0.871         | 1.472         | 0.352       |
| Density CD3-CD20-CD21+CD23- | AA            | 0.545         | 0.559     | 0.304         | 1.026         | 0.061       |
| Density CD3-CD20-CD21+CD23- | TC            | 0.549         | 0.560     | 0.307         | 1.020         | 0.058       |
| Density CD3-CD20-CD21+CD23- | TLS-AA        | 0.584         | 0.762     | 0.617         | 0.942         | 0.012       |
| Density CD3-CD20-CD21+CD23- | TLS-TC        | 0.580         | 0.793     | 0.639         | 0.984         | 0.035       |
| Density CD3-CD20-CD21+CD23+ | AA            | 0.548         | 0.293     | 0.076         | 1.123         | 0.073       |
| Density CD3-CD20-CD21+CD23+ | TC            | 0.543         | 0.354     | 0.093         | 1.349         | 0.128       |
| Density CD3-CD20-CD21+CD23+ | TLS-AA        | 0.564         | 0.819     | 0.630         | 1.066         | 0.138       |
| Density CD3-CD20-CD21+CD23+ | TLS-TC        | 0.567         | 0.817     | 0.625         | 1.069         | 0.141       |
| Density CD3+CD8-            | AA            | 0.564         | 0.552     | 0.363         | 0.839         | 0.005       |
| Density CD3+CD8-            | TC            | 0.567         | 0.543     | 0.363         | 0.813         | 0.003       |
| Density CD3+CD8-            | TLS-AA        | 0.501         | 0.626     | 0.194         | 2.023         | 0.434       |
| Density CD3+CD8-            | TLS-TC        | 0.506         | 0.503     | 0.142         | 1.785         | 0.288       |
| Density CD8+                | AA            | 0.554         | 0.670     | 0.441         | 1.019         | 0.061       |
| Density CD8+                | TC            | 0.559         | 0.648     | 0.437         | 0.960         | 0.031       |
| Density CD8+                | TLS-AA        | 0.545         | 1.470     | 0.778         | 2.778         | 0.235       |
| Density CD8+                | TLS-TC        | 0.486         | 0.929     | 0.578         | 1.493         | 0.761       |
| Density DCLAMP+             | TLS-AA        | 0.511         | 0.949     | 0.745         | 1.209         | 0.671       |
| Density DCLAMP+             | TLS-TC        | 0.507         | 0.938     | 0.737         | 1.196         | 0.607       |

**SUPPLEMENTAL FIGURE 3**

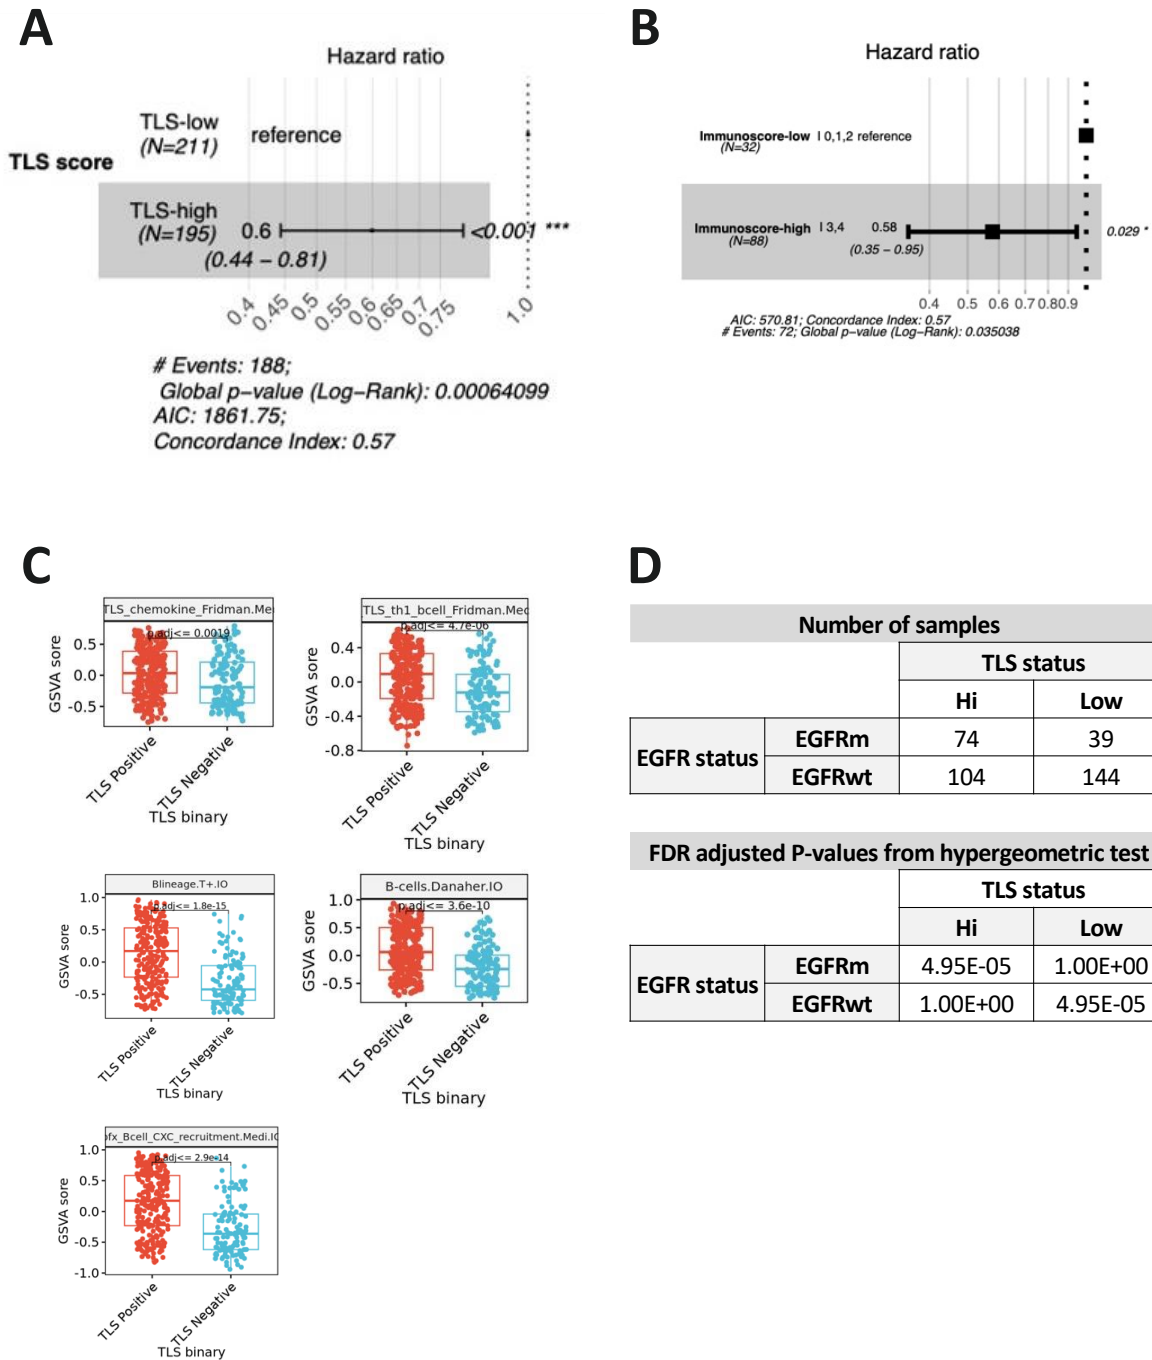

**Supplementary figure 3: Overall survival analysis of TLS score and Immunoscore, TLS presence correlation with gene expression-based B cells and TLS signature scores, and TLS score correlation with EGFR mutational status. (A-B)** Univariate Cox analysis of TLS-high and TLS-low (reference) groups **(A)** and Immunoscore-high and -low (reference) groups **(B)**. **(C)** Box plot comparing of gene expression-based signature score in TLS-present and TLS-absence samples. **(D)** Number of TLS Score -high and -low cases in EGFR mutant and EGFR wildtype cohorts (top panel) and statistical significance with FDR adjusted p-values from a hypergeometric test (lower panel).

**SUPPLEMENTAL FIGURE 4**

**A TLS Score and PD-L1 TC 1%**

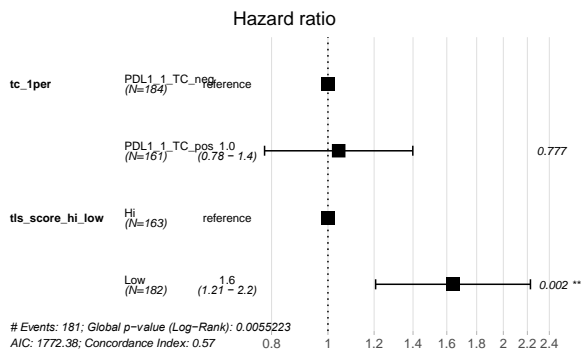

**B TLS Score, PD-L1 TC 1% and histology**

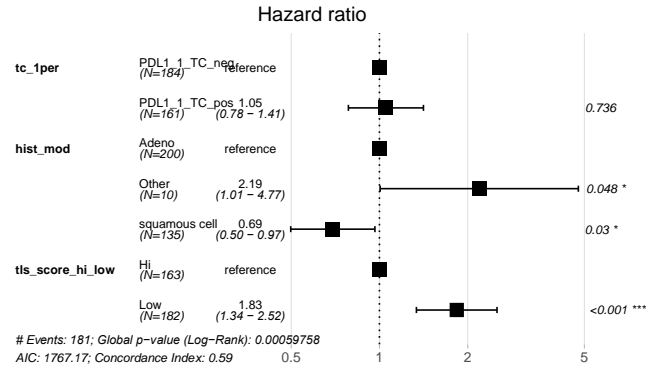

**C TLS Score and PD-L1 TC 50%**

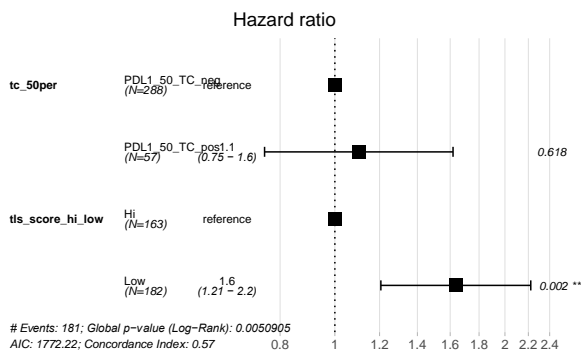

**D TLS Score, PD-L1 TC 50% and histology**

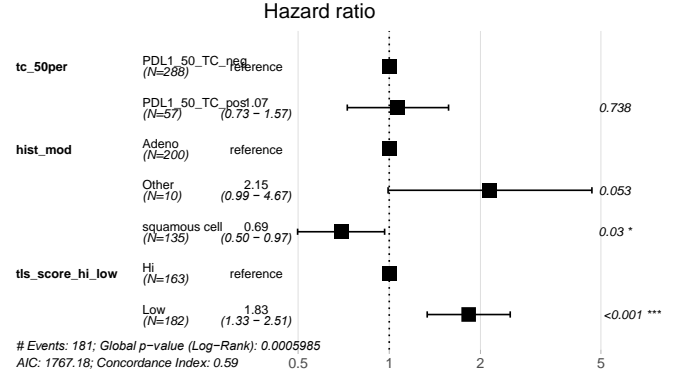

**E TLS Score and PD-L1 IC 1%**

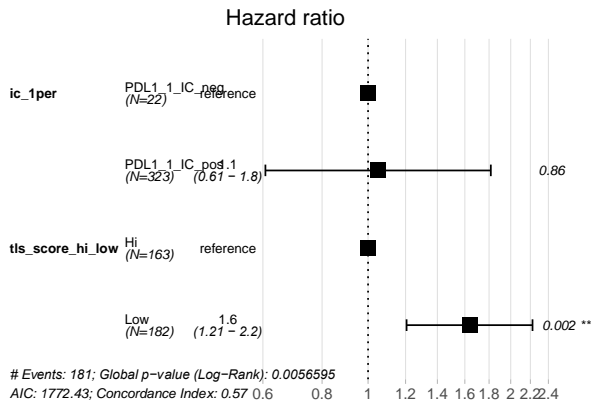

**F TLS Score and PD-L1 IC 50%**

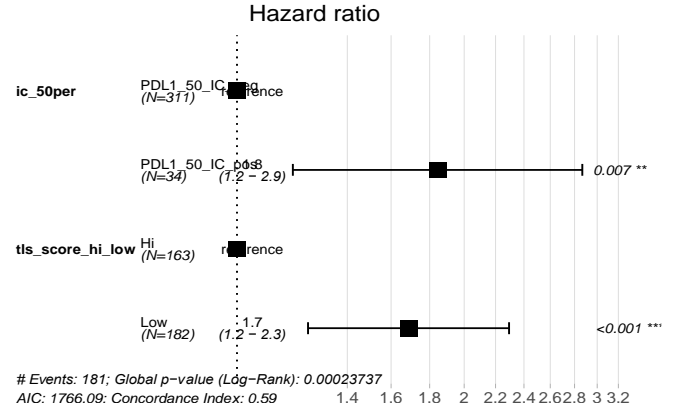

**Supplementary figure 4: TLS score is prognostic after adjusting for PD-L1 status in tumor and immune cells.** Forest plots showing the hazard ratios and 95% confidence interval of TLS Score adjusted for the effect of PD-L1 in tumour cells (A-D) and immune cells (E-F) using multivariable Cox regression analysis and overall survival data. (A) PD-L1 status in tumour cells (stratified using cutoff 1%), (B) PD-L1 status in tumour cells (1% cutoff) and histology, (C) PD-L1 status in tumour cells (stratified using cutoff 50%), (D) PD-L1 status in tumour cells (50% cutoff) and histology, (E) PD-L1 status in immune cells (1% cutoff) and PD-L1 status in immune cells at 50% cutoff (F).
